# Supplementary material for: Comparison of LI-RADS 2018 and KLCA-NCC 2018 for noninvasive diagnosis of hepatocellular carcinoma using magnetic resonance imaging
Source: PubMed Central journal article supplement — Clin Mol Hepatol. 2020 Jun 4;26(3):340–51. doi: 10.3350/cmh.2020.0004 (PMC7364353; doi:10.3350/cmh.2020.0004), 2020-06-04
Supplement: cmh-2020-0004-suppl1.pdf [file cmh-2020-0004-suppl1.pdf]

**Supplementary Table 1.** MRI sequences and parameters

| Acquisition sequence                                                             | Scanner trade name    | Repetition time (msec) | Echo time (msec) | Flip angle (°) | Section thickness (mm) | Matrix size | Intersection gap (mm) |
|----------------------------------------------------------------------------------|-----------------------|------------------------|------------------|----------------|------------------------|-------------|-----------------------|
| Dual-echo T1-weighted gradient-echo                                              | Magnetom Trio Tim     | 4.34                   | 1.34 & 2.76      | 9              | 3                      | 256×192     | 0.6                   |
|                                                                                  | Intera Achieva        | 5.0                    | 1.94 & 3.4       | 20             | 5                      | 160×160     | 1                     |
|                                                                                  | Ingenia or Ingenia CX | 3.5                    | 1.15 & 2.3       | 20             | 5                      | 160×160     | 1                     |
|                                                                                  | Discovery MR 750w     | 4.7                    | 1.11 & 2.26      | 10             | 4                      | 320×250     | 1                     |
| T1-weighted three-dimensional gradient-echo with dynamic contrast enhancement    | Magnetom Trio Tim     | 2.54                   | 0.95             | 13             | 2                      | 256×192     | 0.4                   |
|                                                                                  | Intera Achieva        | 3                      | 1.42             | 10             | 2                      | 256×220     | 0                     |
|                                                                                  | Ingenia or Ingenia CX | 3.1                    | 1.46             | 10             | 2                      | 256×256     | 0                     |
|                                                                                  | Discovery MR 750w     | 4.9                    | 1.7              | 10             | 2.5                    | 224×192     | 0                     |
| T2-weighted turbo spin echo, navigator-triggered                                 | Magnetom Trio Tim     | 466                    | 88–96            | 140            | 2                      | 320×168     | 0.4                   |
|                                                                                  | Intera Achieva        | 988                    | 80               | 90             | 5                      | 288×192     | 1                     |
|                                                                                  | Ingenia or Ingenia CX | 684                    | 80               | 90             | 5                      | 320×192     | 1                     |
|                                                                                  | Discovery MR 750w     | 2,100                  | 80               | 90             | 4                      | 320×320     | 1                     |
| Diffusion-weighted imaging ( $b=0, 50, 400, \text{ and } 800 \text{ sec/mm}^2$ ) | Magnetom Trio Tim     | 5,200                  | 67               | 90             | 5                      | 128×96      | 1                     |
|                                                                                  | Intera Achieva        | 8,500                  | 57               | 90             | 5                      | 288×192     | 1                     |
|                                                                                  | Ingenia or Ingenia CX | 5,858                  | 63               | 90             | 5                      | 129×115     | 1                     |
|                                                                                  | Discovery MR 750w     | 5,800                  | 62               | 90             | 4                      | 96×128      | 1                     |

MRI, magnetic resonance imaging.
