# Supplementary material for: Comparison of LI-RADS 2018 and KLCA-NCC 2018 for noninvasive diagnosis of hepatocellular carcinoma using magnetic resonance imaging
Source: PubMed Central journal article supplement — Clin Mol Hepatol. 2020 Jun 4;26(3):340–51. doi: 10.3350/cmh.2020.0004 (PMC7364353; doi:10.3350/cmh.2020.0004), 2020-06-04
Supplement: cmh-2020-0004-suppl3.pdf [file cmh-2020-0004-suppl3.pdf]

**Supplementary Table 3.** KLCA-NCC 2018 major and ancillary imaging features and targetoid appearance

Major imaging features

Arterial phase hyperenhancement

Washout\*

Ancillary imaging features

Favoring malignancy in general

Mild-to-moderate T2 hyperintensity

Restricted diffusion

Hepatobiliary phase hypointensity

Threshold growth<sup>†</sup>

Favoring HCC in particular

Capsule

Mosaic architecture

Nodule-in-nodule appearance

Fat or blood products in mass

Ancillary features favoring benignity

Size stable  $\geq 2$  years

Marked T2 hyperintensity

No mass effect

Targetoid appearance

Targetoid appearance on diffusion-weighted images

Targetoid appearance on contrast-enhanced sequences

KLCA-NCC, Korean Liver Cancer Association-National Cancer Center; HCC, hepatocellular carcinoma.

\*Washout in the portal venous, delayed, or hepatobiliary phases.

<sup>†</sup>Increase in the size of a nodule by at least 5 mm and at a sufficient rate, either  $\geq 50\%$  increase in size in  $\leq 6$  months or  $\geq 100\%$  increase in size in  $> 6$  months.
