# Supplementary material for: Comparison of LI-RADS 2018 and KLCA-NCC 2018 for noninvasive diagnosis of hepatocellular carcinoma using magnetic resonance imaging
Source: PubMed Central journal article supplement — Clin Mol Hepatol. 2020 Jun 4;26(3):340–51. doi: 10.3350/cmh.2020.0004 (PMC7364353; doi:10.3350/cmh.2020.0004), 2020-06-04
Supplement: cmh-2020-0004-suppl4.pdf [file cmh-2020-0004-suppl4.pdf]

**Supplementary Table 4.** False-positive diagnoses for HCC in LR-5 of LI-RADS 2018 and definite HCC of KLCA-NCC 2018

|                               | Total |                        | ECA-MRI |                        | HBA-MRI |                        |
|-------------------------------|-------|------------------------|---------|------------------------|---------|------------------------|
|                               | No.   | False-positive results | No.     | False-positive results | No.     | False-positive results |
| LR-5 of LI-RADS 2018          | 4     | 4 cHCC-CCAs            | 1       | 1 cHCC-CCA             | 3       | 3 cHCC-CCAs            |
| Definite HCC of KLCA-NCC 2018 | 5     | 5 cHCC-CCAs            | 1       | 1 cHCC-CCA             | 4       | 4 cHCC-CCAs            |

HCC, hepatocellular carcinoma; LI-RADS, Liver Imaging Reporting and Data System; KLCA-NCC, Korean Liver Cancer Association-National Cancer Center; ECA, extracellular contrast agent; MRI, magnetic resonance imaging; HBA, hepatobiliary agent; cHCC-CCA, combined hepatocellular carcinoma-cholangiocarcinoma.
