# Supplementary material for: Comparison of LI-RADS 2018 and KLCA-NCC 2018 for noninvasive diagnosis of hepatocellular carcinoma using magnetic resonance imaging
Source: PubMed Central journal article supplement — Clin Mol Hepatol. 2020 Jun 4;26(3):340–51. doi: 10.3350/cmh.2020.0004 (PMC7364353; doi:10.3350/cmh.2020.0004), 2020-06-04
Supplement: cmh-2020-0004-suppl5.pdf [file cmh-2020-0004-suppl5.pdf]

**Supplementary Table 5.** False-positive diagnoses for HCC in LR-5/4 of LI-RADS 2018 and definite/probable HCC of KLCA-NCC 2018

|                                           | Total |                                                                                               | ECA-MRI |                                                      | HBA-MRI |                                                                          |
|-------------------------------------------|-------|-----------------------------------------------------------------------------------------------|---------|------------------------------------------------------|---------|--------------------------------------------------------------------------|
|                                           | No.   | False-positive results                                                                        | No.     | False-positive results                               | No.     | False-positive results                                                   |
| LR-5/4 of LI-RADS 2018                    | 16    | 6 cHCC-CCAs<br>1 Hepatoblastoma<br>1 Metastasis<br>2 FNH-like nodules<br>6 Dysplastic nodules | 3       | 1 cHCC-CCAs<br>1 Hepatoblastoma<br>1 FNH-like nodule | 13      | 5 cHCC-CCAs<br>1 Metastasis<br>1 FNH-like nodule<br>6 Dysplastic nodules |
| Definite/probable HCC of<br>KLCA-NCC 2018 | 7     | 6 cHCC-CCAs<br>1 Hepatoblastoma                                                               | 2       | 1 cHCC-CCA<br>1 Hepatoblastoma                       | 5       | 5 cHCC-CCAs                                                              |

HCC, hepatocellular carcinoma; LI-RADS, Liver Imaging Reporting and Data System; KLCA-NCC, Korean Liver Cancer Association-National Cancer Center; ECA, extracellular contrast agent; MRI, magnetic resonance imaging; HBA, hepatobiliary agent; cHCC-CCA, combined hepatocellular carcinoma-cholangiocarcinoma; FNH, focal nodular hyperplasia.
