# Supplementary material for: Comparison of LI-RADS 2018 and KLCA-NCC 2018 for noninvasive diagnosis of hepatocellular carcinoma using magnetic resonance imaging
Source: PubMed Central journal article supplement — Clin Mol Hepatol. 2020 Jun 4;26(3):340–51. doi: 10.3350/cmh.2020.0004 (PMC7364353; doi:10.3350/cmh.2020.0004), 2020-06-04
Supplement: cmh-2020-0004-suppl6.pdf [file cmh-2020-0004-suppl6.pdf]

**Supplementary Table 6.** Diagnostic performances of LR-5 of LI-RADS 2018 and definite HCC of KLCA-NCC 2018 for diagnosing HCC on ECA-MRI and HBA-MRI in the subgroup with hepatitis B

|                 | LR-5 of LI-RADS 2018 (95% CI) | Definite HCC of KLCA-NCC 2018 (95% CI) | P-value* |
|-----------------|-------------------------------|----------------------------------------|----------|
| ECA-MRI (n=71)  |                               |                                        |          |
| Sensitivity     | 75.0 (63.7–86.3)              | 67.9 (55.6–80.1)                       | 0.094    |
| Specificity     | 93.3 (80.7–100.0)             | 93.3 (80.7–100.0)                      | 0.999    |
| HBA-MRI (n=246) |                               |                                        |          |
| Sensitivity     | 68.5 (61.8–75.1)              | 79.1 (73.3–85.0)                       | <0.001   |
| Specificity     | 96.6 (92.0–100.0)             | 94.9 (89.3–100.0)                      | 0.313    |

LI-RADS, Liver Imaging Reporting and Data System; HCC, hepatocellular carcinoma; KLCA-NCC, Korean Liver Cancer Association-National Cancer Center; ECA, extracellular contrast agent; MRI, magnetic resonance imaging; HBA, hepatobiliary agent; CI, confidence interval.

\*P-values between LR-5 of LI-RADS 2018 and definite HCC of KLCA-NCC 2018 by using the generalized estimating equation method.
