# Supplementary material for: Comparison of LI-RADS 2018 and KLCA-NCC 2018 for noninvasive diagnosis of hepatocellular carcinoma using magnetic resonance imaging
Source: PubMed Central journal article supplement — Clin Mol Hepatol. 2020 Jun 4;26(3):340–51. doi: 10.3350/cmh.2020.0004 (PMC7364353; doi:10.3350/cmh.2020.0004), 2020-06-04
Supplement: cmh-2020-0004-suppl7.pdf [file cmh-2020-0004-suppl7.pdf]

**Supplementary Table 7.** Diagnostic performances of LR-5/4 of LI-RADS 2018 and definite/probable HCC of KLCA-NCC 2018 for diagnosing HCC on ECA-MRI and HBA-MRI in the subgroup with hepatitis B

|                 | LR-5/4 of LI-RADS 2018 (95% CI) | Definite/probable HCC of KLCA-NCC 2018 (95% CI) | P-value* |
|-----------------|---------------------------------|-------------------------------------------------|----------|
| ECA-MRI (n=71)  |                                 |                                                 |          |
| Sensitivity     | 87.5 (78.8–96.2)                | 83.9 (74.3–93.6)                                | 0.313    |
| Specificity     | 86.7 (69.5–100.0)               | 86.7 (69.5–100.0)                               | 0.999    |
| HBA-MRI (n=246) |                                 |                                                 |          |
| Sensitivity     | 87.7 (83.0–92.4)                | 85.0 (79.9–90.1)                                | 0.056    |
| Specificity     | 81.4 (71.4–91.3)                | 93.2 (86.8–99.6)                                | 0.005    |

LI-RADS, Liver Imaging Reporting and Data System; HCC, hepatocellular carcinoma; KLCA-NCC, Korean Liver Cancer Association-National Cancer Center; ECA, extracellular contrast agent; MRI, magnetic resonance imaging; HBA, hepatobiliary agent; CI, confidence interval.

\*P-values between LR-5/4 of LI-RADS 2018 and definite/probable HCC of KLCA-NCC 2018 by using the generalized estimating equation method.
