# Supplementary material for: Comparison of LI-RADS 2018 and KLCA-NCC 2018 for noninvasive diagnosis of hepatocellular carcinoma using magnetic resonance imaging
Source: PubMed Central journal article supplement — Clin Mol Hepatol. 2020 Jun 4;26(3):340–51. doi: 10.3350/cmh.2020.0004 (PMC7364353; doi:10.3350/cmh.2020.0004), 2020-06-04
Supplement: cmh-2020-0004-suppl8.pdf [file cmh-2020-0004-suppl8.pdf]

**Supplementary Table 8.** Inter-reader agreement for LI-RADS 2018 and KLCA-NCC 2018

|                      | All (n=352) |     |     |                         | ECA-MRI (n=86) |    |    |                         | HBA-MRI (n=266) |     |     |                         |
|----------------------|-------------|-----|-----|-------------------------|----------------|----|----|-------------------------|-----------------|-----|-----|-------------------------|
|                      | Consensus   | R1  | R2  | $\kappa$ value (95% CI) | Consensus      | R1 | R2 | $\kappa$ value (95% CI) | Consensus       | R1  | R2  | $\kappa$ value (95% CI) |
| LI-RADS 2018         |             |     |     | 0.93 (0.89–0.96)        |                |    |    | 0.97 (0.93–1.00)        |                 |     |     | 0.90 (0.86–0.95)        |
| LR-2                 | 30          | 31  | 30  |                         | 7              | 7  | 7  |                         | 23              | 24  | 23  |                         |
| LR-3                 | 14          | 13  | 13  |                         | 7              | 7  | 6  |                         | 7               | 6   | 7   |                         |
| LR-4                 | 59          | 53  | 64  |                         | 9              | 8  | 10 |                         | 50              | 45  | 54  |                         |
| LR-5                 | 188         | 185 | 184 |                         | 48             | 48 | 48 |                         | 140             | 137 | 136 |                         |
| LR-TIV               | 2           | 2   | 2   |                         | 1              | 1  | 1  |                         | 1               | 1   | 1   |                         |
| LR-M                 | 59          | 68  | 59  |                         | 14             | 15 | 14 |                         | 45              | 53  | 45  |                         |
| KLCA-NCC 2018        |             |     |     | 0.94 (0.91–0.96)        |                |    |    | 0.95 (0.91–0.99)        |                 |     |     | 0.93 (0.89–0.96)        |
| Benign               | 31          | 31  | 31  |                         | 11             | 11 | 11 |                         | 20              | 20  | 20  |                         |
| Indeterminate        | 31          | 32  | 31  |                         | 7              | 7  | 7  |                         | 24              | 25  | 24  |                         |
| Probable HCC         | 24          | 17  | 24  |                         | 10             | 6  | 10 |                         | 14              | 11  | 14  |                         |
| Definite HCC         | 207         | 204 | 206 |                         | 44             | 47 | 44 |                         | 163             | 157 | 162 |                         |
| Targetoid appearance | 59          | 68  | 60  |                         | 14             | 15 | 14 |                         | 45              | 53  | 46  |                         |

LI-RADS, Liver Imaging Reporting and Data System; KLCA-NCC, Korean Liver Cancer Association-National Cancer Center; ECA, extracellular contrast agent; MRI, magnetic resonance imaging; HBA, hepatobiliary agent; R1, reader 1; R2, reader 2; CI, confidence interval; HCC, hepatocellular carcinoma.
